# Supplementary material for: Synthesis of magnetic porous γ-Fe2O3/C@HKUST-1 composites for efficient removal of dyes and heavy metal ions from aqueous solution
Source: Royal Society of Chemistry journal article supplement (doi:10.1039/c4ra12468e), 2014-12-12
Supplement: c4ra12468e1.pdf [file c4ra12468e1.pdf]

## Electronic Supplementary Information

### **Synthesis of magnetic porous $\gamma\text{-Fe}_2\text{O}_3/\text{C}@\text{HKUST-1}$ composites for efficient removal of dyes and heavy metal ions from aqueous solution**

Yuhao Xiong, Fanggui Ye,\* Cong Zhang, Shufen Shen, Linjing Su, Shulin Zhao

Key Laboratory for the Chemistry and Molecular Engineering of Medicinal Resources (Ministry of Education of China), College of Chemistry and Pharmaceutical Science of Guangxi Normal University, Guilin 541004, P. R. China.

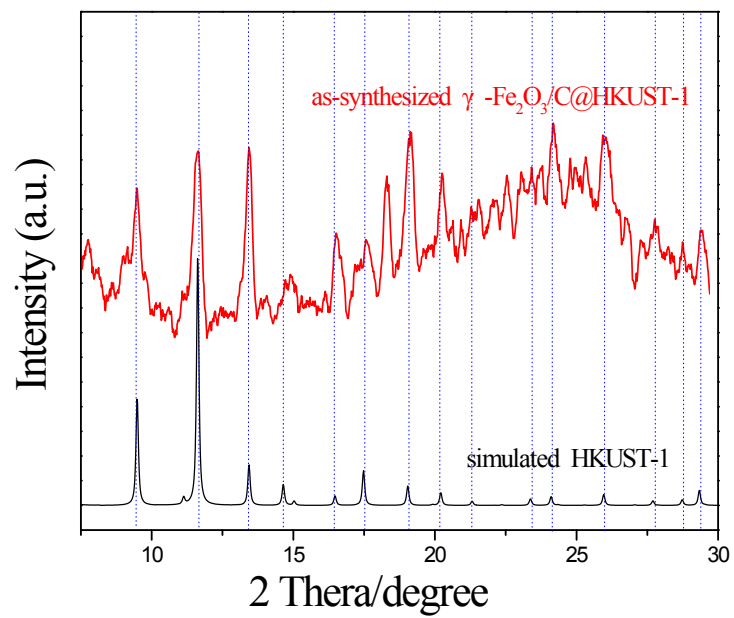

Fig.S1 The XRD local amplification figure (7.5°-30°) of  $\gamma$ -Fe<sub>2</sub>O<sub>3</sub>/C@HKUST-1.

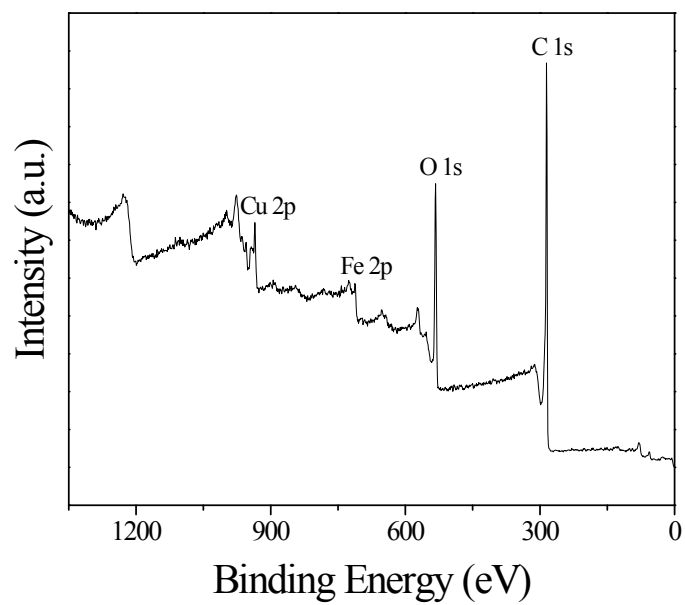

Fig.S2 XPS survey spectrum of the as-prepared  $\gamma$ -Fe<sub>2</sub>O<sub>3</sub>/C@HKUST-1.

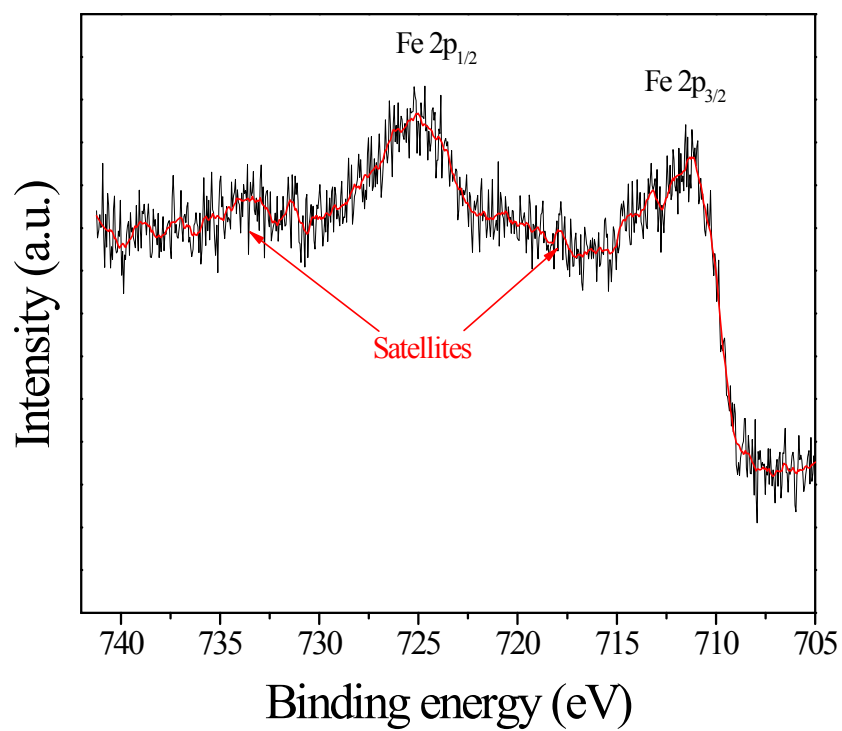

Fig. S3 XPS spectrum of as-prepared  $\gamma$ -Fe<sub>2</sub>O<sub>3</sub>/C@HKUST-1: high-resolution Fe 2p binding energy spectrum.

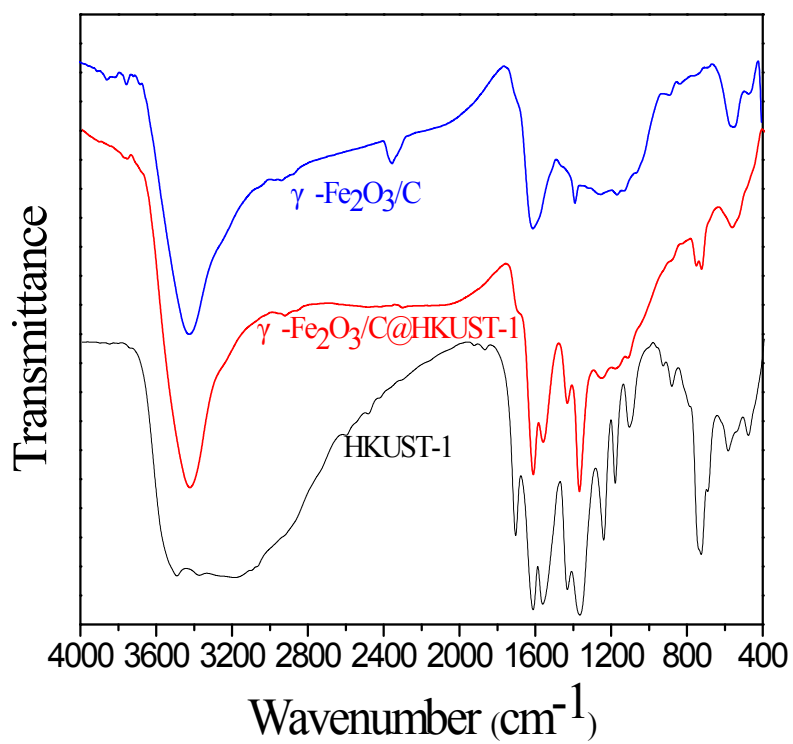

Fig. S4 FT-IR spectrum of  $\gamma$ -Fe<sub>2</sub>O<sub>3</sub>/C,  $\gamma$ -Fe<sub>2</sub>O<sub>3</sub>/C@HKUST-1 and HKUST-1

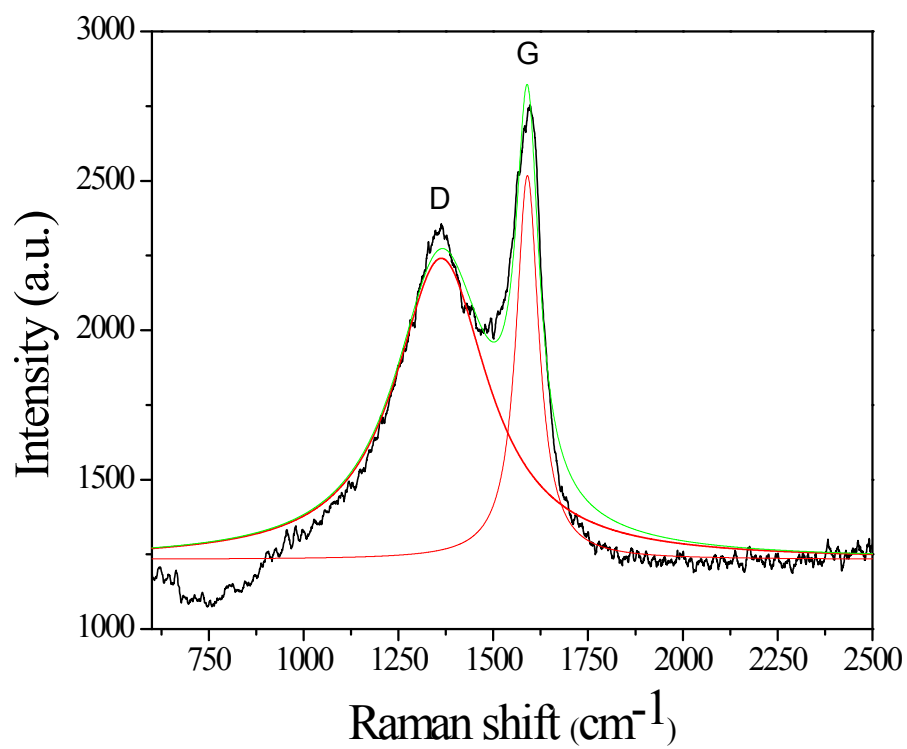

Fig. S5 Raman spectrum of  $\gamma$ -Fe<sub>2</sub>O<sub>3</sub>/C@HKUST-1 sample (red line: the integral peak, green line: the fitted curve by Gaussian type)

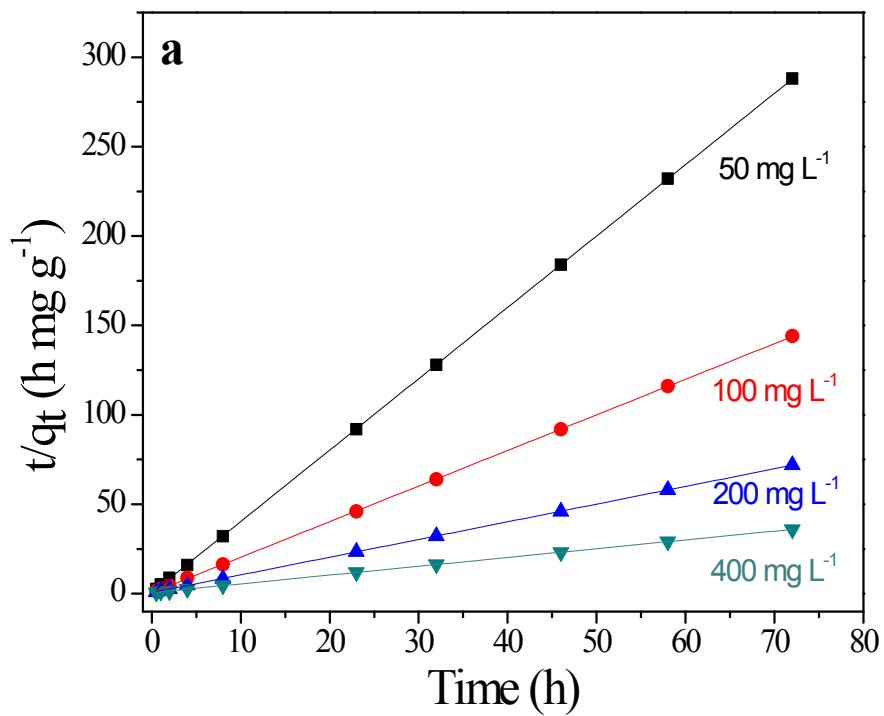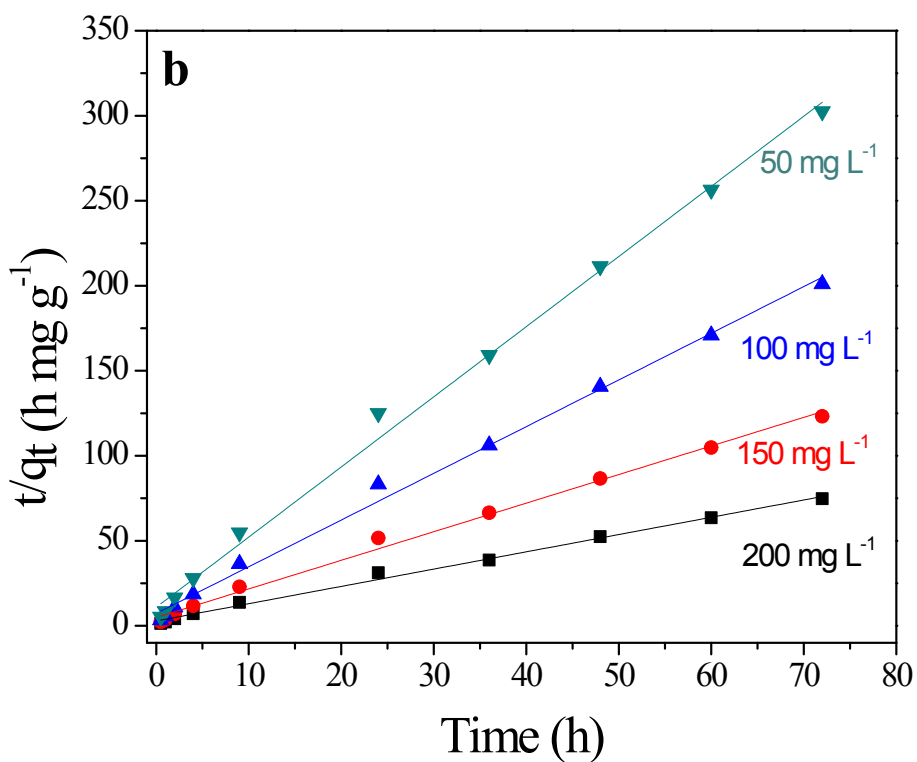

Fig. S6 Plots of pseudo-second-order kinetics for the adsorption of MB (a) and Cr (VI) (b) on  $\gamma$ -Fe<sub>2</sub>O<sub>3</sub>/C@HKUST-1.

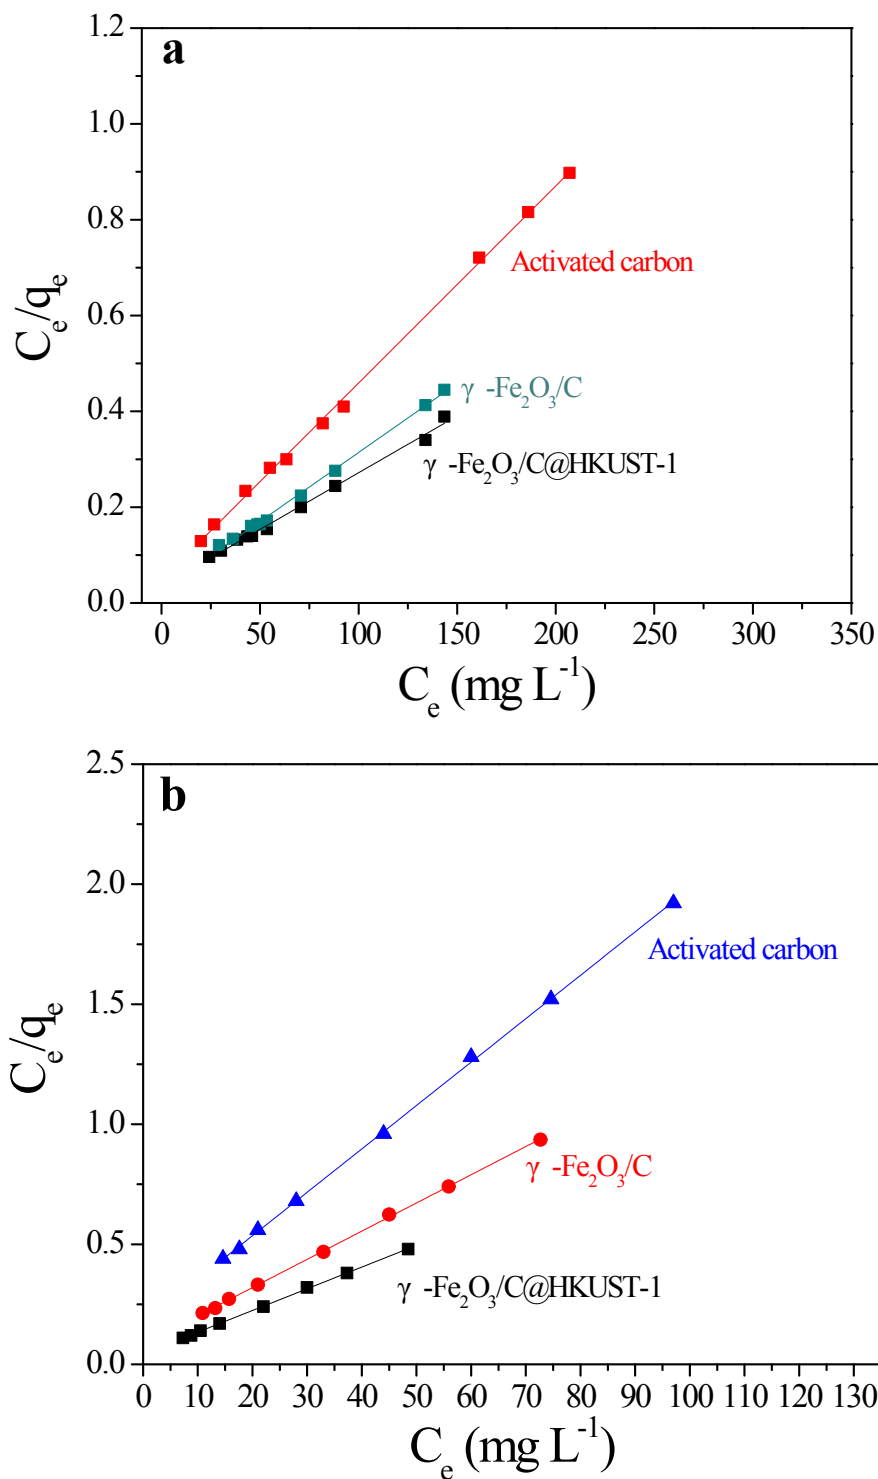

Fig. S7 Langmuir plots of the isotherms for MB (a) and Cr (VI) (b) adsorption onto different adsorbents.



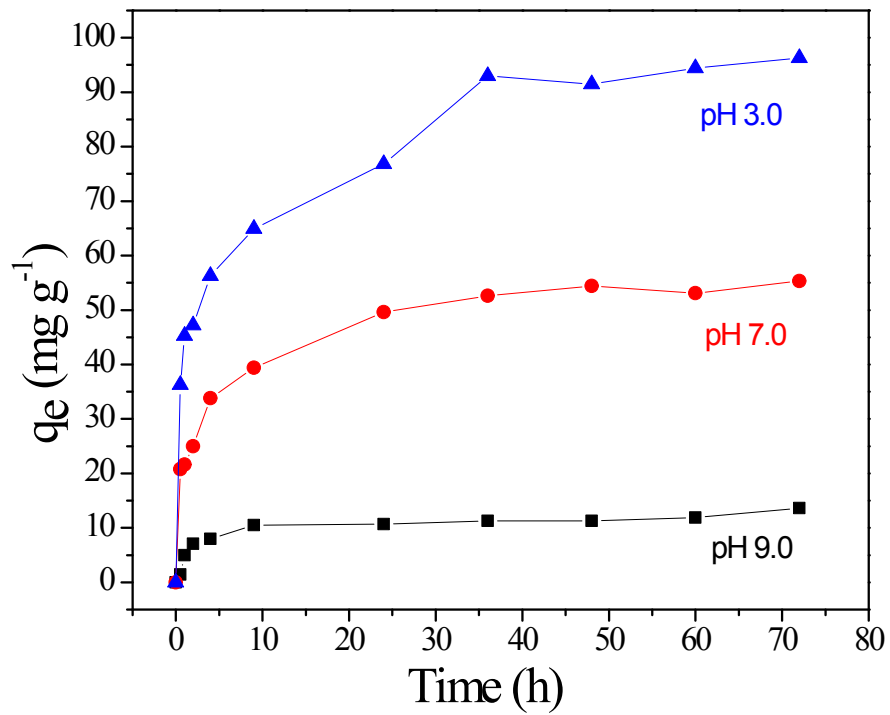

Fig. S8 Influence of pH on the adsorption of Cr (VI)

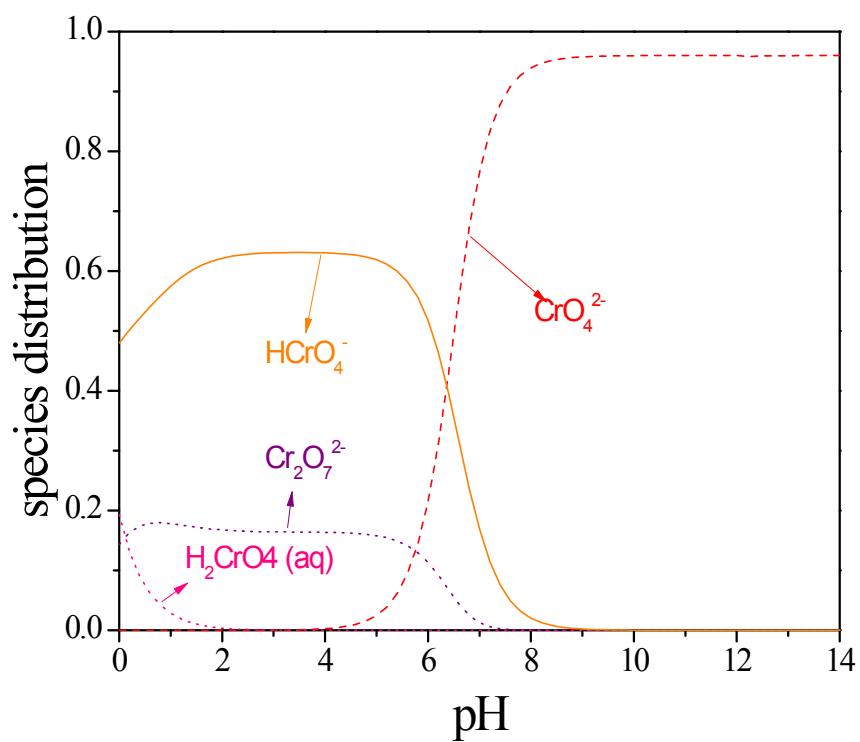

Fig. S9 The species of Cr (VI) (obtained by running Visual MINTEQ 3.0 based on the experimental data) at different pH values of solution.

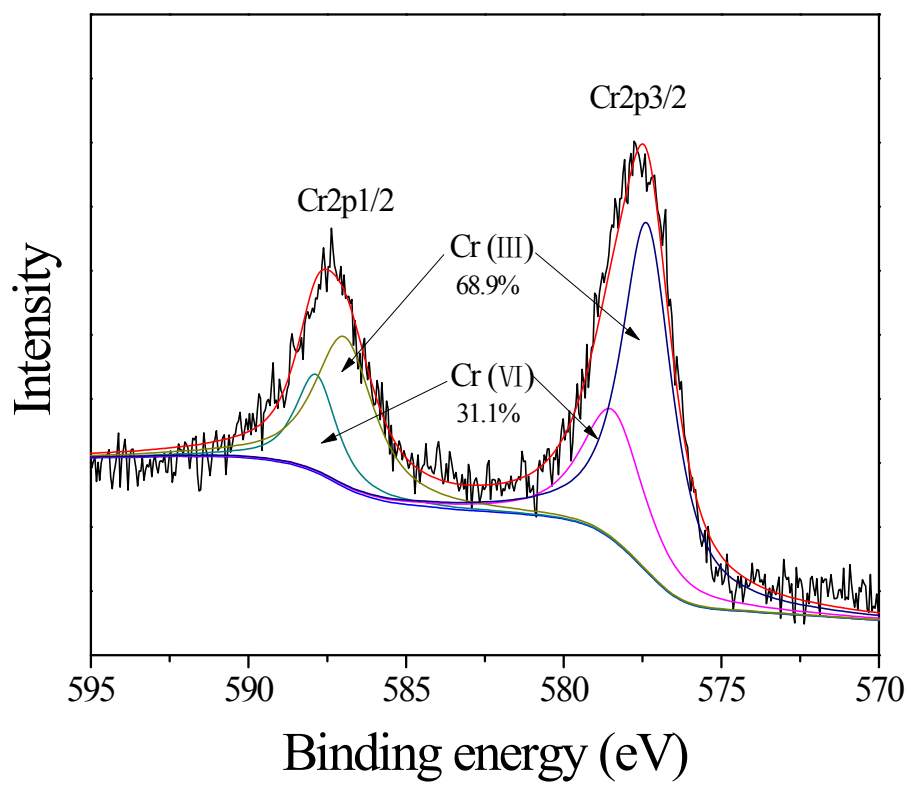

Fig. S10 XPS spectra of Cr 2p on the  $\gamma$ -Fe<sub>2</sub>O<sub>3</sub>/C@HKUST-1 surface after sorption.

Table S1 Kinetic parameters for the adsorption of MB and Cr (VI) on  $\gamma$ -Fe<sub>2</sub>O<sub>3</sub>/C@HKUST-1 at 303 K.

| Pollutants | C <sub>0</sub> /mg L <sup>-1</sup> | q <sub>e</sub> (exp)/mg g <sup>-1</sup> | Pseudo-second-order kinetic model       |                                                      |                |
|------------|------------------------------------|-----------------------------------------|-----------------------------------------|------------------------------------------------------|----------------|
|            |                                    |                                         | q <sub>e</sub> (cal)/mg g <sup>-1</sup> | k <sub>2</sub> /g mg <sup>-1</sup> min <sup>-1</sup> | R <sup>2</sup> |
| MB         | 400                                | 198.5                                   | 204.1                                   | 5.80 × 10 <sup>-3</sup>                              | 0.999          |
|            | 200                                | 100                                     | 101.0                                   | 6.35 × 10 <sup>-3</sup>                              | 0.999          |
|            | 100                                | 48.6                                    | 50.2                                    | 5.05 × 10 <sup>-3</sup>                              | 0.999          |
|            | 50                                 | 23.7                                    | 25.1                                    | 5.21 × 10 <sup>-3</sup>                              | 0.999          |
| Cr (VI)    | 200                                | 96.3                                    | 98.1                                    | 2.84 × 10 <sup>-2</sup>                              | 0.995          |
|            | 150                                | 58.4                                    | 59.5                                    | 4.88 × 10 <sup>-2</sup>                              | 0.995          |
|            | 100                                | 35.8                                    | 36.4                                    | 7.27 × 10 <sup>-2</sup>                              | 0.996          |
|            | 50                                 | 23.8                                    | 24.2                                    | 1.09 × 10 <sup>-1</sup>                              | 0.996          |

Notes: C<sub>0</sub>, initial concentration of MB or Cr (VI); q<sub>e</sub> (cal), calculated adsorption capacity; q<sub>e</sub> (exp), experimental adsorption capacity; k<sub>2</sub>, pseudo-second-order kinetic constant.

Table S2 Langmuir parameters for the adsorption of MB and Cr (VI) on  $\gamma$ -Fe<sub>2</sub>O<sub>3</sub>/C@HKUST-1 at 303 K.

| Pollutants | $q_{\text{exp}} / \text{mg g}^{-1}$ | Langmuir constants |       |       |
|------------|-------------------------------------|--------------------|-------|-------|
|            |                                     | $Q_m$              | $K_L$ | $R^2$ |
| MB         | 370.2                               | 400                | 0.07  | 0.999 |
| Cr (VI)    | 101.4                               | 105                | 0.32  | 0.998 |

Notes:  $q_{\text{exp}}$ , experimental adsorption capacity;  $Q_m$ , calculated adsorption capacity;  $K_L$ , Langmuir constant.
